# Supplementary material for: Strategic donor behaviour and country vulnerability in health aid transitions
Source: HighWire-hosted journal article supplement (doi:10.1136/bmjgh-2023-012953), 2023-11-01
Supplement: bmjgh-2023-012953supp002_data_supplement.pdf [file bmjgh-2023-012953supp002_data_supplement.pdf]

## Appendix 2 Bilateral donors included in analysis (n=17)

|    | <b>Bilateral donors</b> |
|----|-------------------------|
| 1  | Australia               |
| 2  | Belgium                 |
| 3  | Canada                  |
| 4  | Denmark                 |
| 5  | France                  |
| 6  | Germany                 |
| 7  | Ireland                 |
| 8  | Italy                   |
| 9  | Japan                   |
| 10 | Korea                   |
| 11 | Netherlands             |
| 12 | Norway                  |
| 13 | Spain                   |
| 14 | Sweden                  |
| 15 | Switzerland             |
| 16 | United Kingdom          |
| 17 | United States           |
