# Supplementary material for: Strategic donor behaviour and country vulnerability in health aid transitions
Source: HighWire-hosted journal article supplement (doi:10.1136/bmjgh-2023-012953), 2023-11-01
Supplement: bmjgh-2023-012953supp003_data_supplement.pdf [file bmjgh-2023-012953supp003_data_supplement.pdf]

## Appendix 3 Additional analysis on four donors

Table S3.1 Impact of Gavi transition and other factors on all sector ODA from specific donors

| Variable                                      | US<br>(M27)            | US<br>(M28)           | UK<br>(M29)           | UKO<br>(M30)          | JP<br>(M31)           | JP<br>(M32)           | BL<br>(M33)           | BL<br>(M34)           |
|-----------------------------------------------|------------------------|-----------------------|-----------------------|-----------------------|-----------------------|-----------------------|-----------------------|-----------------------|
| <b>Gavi graduate</b>                          | -0.586*<br>(0.341)     |                       | 0.0689<br>(0.294)     |                       | -0.883**<br>(0.343)   |                       | 0.207<br>(0.235)      |                       |
| <b>Gavi disbursement</b>                      |                        | 0.309***<br>(0.0959)  |                       | 0.227**<br>(0.0992)   |                       | 0.237***<br>(0.0825)  |                       | 0.0485<br>(0.0783)    |
| <b>Donor-recipient relationship variables</b> |                        |                       |                       |                       |                       |                       |                       |                       |
| Distance                                      | -0.506<br>(0.321)      | -0.583*<br>(0.320)    | 0.402<br>(0.416)      | 0.393<br>(0.405)      | -1.375***<br>(0.198)  | -1.408***<br>(0.210)  | 0.00896<br>(0.277)    | -0.0266<br>(0.271)    |
| Donor imports                                 | 0.113*<br>(0.0633)     | 0.114*<br>(0.0650)    | 0.0776<br>(0.0879)    | 0.0615<br>(0.0840)    | -0.0670<br>(0.0452)   | -0.0535<br>(0.0494)   | -0.134*<br>(0.0778)   | -0.143*<br>(0.0769)   |
| Migrants                                      | 0.0453<br>(0.0835)     | 0.0280<br>(0.0836)    | 0.0776<br>(0.0949)    | 0.0667<br>(0.0927)    | 0.00847<br>(0.0464)   | 0.00861<br>(0.0538)   | -0.0708<br>(0.0804)   | -0.0704<br>(0.0809)   |
| Colony                                        | -0.177<br>(0.266)      | -0.188<br>(0.251)     | -0.337<br>(0.329)     | -0.415<br>(0.306)     | 0.389**<br>(0.188)    | 0.418**<br>(0.197)    | 0.998***<br>(0.273)   | 0.971***<br>(0.274)   |
| US military                                   | 0.361***<br>(0.0650)   | 0.323***<br>(0.0587)  | 0.203***<br>(0.0511)  | 0.167***<br>(0.0531)  | 0.117**<br>(0.0470)   | 0.101**<br>(0.0493)   | 0.0407<br>(0.0504)    | 0.0292<br>(0.0518)    |
| Donor exports                                 | -0.210***<br>(0.0790)  | -0.194**<br>(0.0791)  | -0.200**<br>(0.100)   | -0.171*<br>(0.0972)   | 0.0713<br>(0.0586)    | 0.0651<br>(0.0630)    | 0.0642<br>(0.0832)    | 0.0767<br>(0.0835)    |
| <b>Recipient variables</b>                    |                        |                       |                       |                       |                       |                       |                       |                       |
| Population                                    | 0.634***<br>(0.123)    | 0.507***<br>(0.113)   | 0.801***<br>(0.132)   | 0.710***<br>(0.116)   | 0.518***<br>(0.0554)  | 0.402***<br>(0.0858)  | 0.384***<br>(0.0800)  | 0.371***<br>(0.0788)  |
| GDP per capita                                | -0.411**<br>(0.192)    | -0.410**<br>(0.191)   | -0.814**<br>(0.310)   | -0.709**<br>(0.285)   | -0.182<br>(0.146)     | -0.250<br>(0.185)     | -0.886***<br>(0.259)  | -0.859***<br>(0.258)  |
| Disaster                                      | 0.00864<br>(0.0158)    | 0.00408<br>(0.0157)   | -0.00662<br>(0.0187)  | -0.00783<br>(0.0192)  | 0.0164*<br>(0.00951)  | 0.0132<br>(0.00985)   | -0.00357<br>(0.0115)  | -0.00293<br>(0.0113)  |
| Civil war                                     | 0.239<br>(0.269)       | 0.173<br>(0.245)      | 1.074***<br>(0.342)   | 0.978***<br>(0.335)   | 0.186<br>(0.134)      | 0.143<br>(0.141)      | -0.0436<br>(0.237)    | -0.0844<br>(0.244)    |
| Democracy                                     | -0.120*<br>(0.0708)    | -0.108<br>(0.0668)    | -0.180**<br>(0.0758)  | -0.167**<br>(0.0753)  | -0.121***<br>(0.0399) | -0.108**<br>(0.0438)  | -0.0341<br>(0.0604)   | -0.0279<br>(0.0606)   |
| U5mr                                          | -0.000657<br>(0.00452) | -0.00102<br>(0.00418) | 0.000856<br>(0.00830) | 0.000220<br>(0.00842) | 4.42e-05<br>(0.00273) | 0.000801<br>(0.00293) | -0.00678<br>(0.00611) | -0.00717<br>(0.00595) |
| Dtp3 coverage                                 | -0.00399<br>(0.00649)  | -0.00639<br>(0.00594) | 0.0197*<br>(0.0111)   | 0.0178<br>(0.0114)    | 0.00510<br>(0.00402)  | 0.00413<br>(0.00467)  | 0.00294<br>(0.00734)  | 0.00202<br>(0.00761)  |
| HDI                                           | -0.909<br>(1.342)      | 0.186<br>(1.312)      | -0.673<br>(1.830)     | -0.194<br>(1.618)     | 0.706<br>(0.865)      | 1.737*<br>(0.889)     | 0.956<br>(1.816)      | 1.082<br>(1.835)      |
| Constant                                      | 11.64***<br>(3.763)    | 11.52***<br>(3.883)   | 2.860<br>(5.204)      | 2.152<br>(5.055)      | 15.32***<br>(2.047)   | 15.06***<br>(2.267)   | 7.666**<br>(3.273)    | 8.065**<br>(3.288)    |
| Observations                                  | 697                    | 695                   | 635                   | 633                   | 706                   | 704                   | 583                   | 582                   |
| R-squared                                     | 0.629                  | 0.646                 | 0.600                 | 0.605                 | 0.685                 | 0.681                 | 0.426                 | 0.425                 |
| Model                                         | OLS                    | OLS                   | OLS                   | OLS                   | OLS                   | OLS                   | OLS                   | OLS                   |
| FE                                            | Year                   | Year                  | Year                  | Year                  | Year                  | Year                  | Year                  | Year                  |
| Cluster                                       | Dyad                   | Dyad                  | Dyad                  | Dyad                  | Dyad                  | Dyad                  | Dyad                  | Dyad                  |

Notes: Dependent variable is the log of (one plus) all sector aid disbursement from donor to recipient in year t. All variables except Gavi Graduate, Colony, Civil War, Democracy, U5MR, DTP3 coverage and HDI are measured in natural logs. \*p<0.10, \*\*p<0.05, \*\*\*p<0.01.

Table S3.2 Impact of Gavi transition and other factors on health ODA from specific donors

| Variable                                      | US<br>(M35)           | US<br>(M36)           | UK<br>(M37)           | UKO<br>(M38)          | JP<br>(M39)            | JP<br>(M40)            | BL<br>(M41)           | BL<br>(M42)           |
|-----------------------------------------------|-----------------------|-----------------------|-----------------------|-----------------------|------------------------|------------------------|-----------------------|-----------------------|
| <b>Gavi graduate</b>                          | -1.216**<br>(0.545)   |                       | -0.602<br>(0.515)     |                       | -0.328*<br>(0.176)     |                        | 0.0113<br>(0.300)     |                       |
| <b>Gavi disbursement</b>                      |                       | 0.474***<br>(0.134)   |                       | 0.258**<br>(0.125)    |                        | 0.151***<br>(0.0435)   |                       | 0.0310<br>(0.0697)    |
| <b>Donor-recipient relationship variables</b> |                       |                       |                       |                       |                        |                        |                       |                       |
| Distance                                      | 0.0712<br>(0.446)     | -0.0248<br>(0.459)    | 0.637<br>(0.520)      | 0.693<br>(0.513)      | -0.572***<br>(0.154)   | -0.607***<br>(0.150)   | 0.230<br>(0.334)      | 0.231<br>(0.330)      |
| Donor imports                                 | 0.170<br>(0.113)      | 0.177<br>(0.117)      | 0.293**<br>(0.128)    | 0.279**<br>(0.123)    | 0.00718<br>(0.0419)    | 0.00932<br>(0.0393)    | -0.148<br>(0.0910)    | -0.150*<br>(0.0911)   |
| Migrants                                      | 0.140<br>(0.116)      | 0.116<br>(0.112)      | 0.185<br>(0.133)      | 0.173<br>(0.129)      | 0.0669**<br>(0.0340)   | 0.0666**<br>(0.0329)   | -0.0849<br>(0.0892)   | -0.0860<br>(0.0891)   |
| Colony                                        | -0.314<br>(0.361)     | -0.299<br>(0.336)     | -0.402<br>(0.391)     | -0.442<br>(0.380)     | 0.301**<br>(0.139)     | 0.294**<br>(0.136)     | 0.622**<br>(0.312)    | 0.610**<br>(0.309)    |
| US military                                   | 0.155*<br>(0.0794)    | 0.105<br>(0.0759)     | -0.00996<br>(0.108)   | -0.0402<br>(0.105)    | 0.147***<br>(0.0451)   | 0.131***<br>(0.0438)   | -0.0295<br>(0.0482)   | -0.0347<br>(0.0492)   |
| Donor exports                                 | -0.124<br>(0.123)     | -0.110<br>(0.125)     | -0.284*<br>(0.158)    | -0.259*<br>(0.153)    | -0.0263<br>(0.0447)    | -0.0224<br>(0.0427)    | 0.0437<br>(0.0944)    | 0.0483<br>(0.0948)    |
| <b>Recipient variables</b>                    |                       |                       |                       |                       |                        |                        |                       |                       |
| Population                                    | 0.668***<br>(0.151)   | 0.457***<br>(0.141)   | 0.875***<br>(0.172)   | 0.752***<br>(0.160)   | 0.181***<br>(0.0584)   | 0.112*<br>(0.0608)     | 0.386***<br>(0.0913)  | 0.374***<br>(0.0922)  |
| GDP per capita                                | -0.678**<br>(0.298)   | -0.725**<br>(0.294)   | -1.138***<br>(0.400)  | -1.103***<br>(0.371)  | -0.143<br>(0.110)      | -0.144<br>(0.106)      | -0.740**<br>(0.363)   | -0.734**<br>(0.366)   |
| Disaster                                      | -0.0250<br>(0.0205)   | -0.0311<br>(0.0201)   | -0.0352<br>(0.0225)   | -0.0386*<br>(0.0224)  | 0.0246***<br>(0.00806) | 0.0226***<br>(0.00803) | 0.00619<br>(0.0135)   | 0.00624<br>(0.0134)   |
| Civil war                                     | -0.0848<br>(0.327)    | -0.177<br>(0.307)     | 0.935**<br>(0.372)    | 0.875**<br>(0.378)    | 0.0497<br>(0.162)      | 0.0151<br>(0.160)      | -0.158<br>(0.249)     | -0.174<br>(0.251)     |
| Democracy                                     | -0.259***<br>(0.0835) | -0.240***<br>(0.0780) | -0.337***<br>(0.0965) | -0.324***<br>(0.0948) | -0.0379<br>(0.0448)    | -0.0324<br>(0.0424)    | -0.0295<br>(0.0578)   | -0.0259<br>(0.0574)   |
| U5mr                                          | 0.00217<br>(0.00708)  | 0.00203<br>(0.00660)  | 0.00399<br>(0.00908)  | 0.00488<br>(0.00919)  | 0.000895<br>(0.00267)  | 0.00118<br>(0.00263)   | -0.00414<br>(0.00636) | -0.00402<br>(0.00641) |
| Dtp3 coverage                                 | 0.00862<br>(0.0118)   | 0.00519<br>(0.0112)   | 0.0320**<br>(0.0124)  | 0.0310**<br>(0.0126)  | 0.00411<br>(0.00409)   | 0.00324<br>(0.00393)   | 0.0141<br>(0.00884)   | 0.0139<br>(0.00894)   |
| HDI                                           | -2.438<br>(1.699)     | -0.533<br>(1.586)     | -3.567*<br>(1.923)    | -2.407<br>(2.033)     | -0.761<br>(0.932)      | -0.243<br>(0.885)      | 1.141<br>(3.199)      | 1.306<br>(3.333)      |
| Constant                                      | 6.134<br>(5.779)      | 6.187<br>(6.010)      | 0.695<br>(6.327)      | -0.857<br>(6.296)     | 6.100***<br>(1.817)    | 6.015***<br>(1.818)    | 2.527<br>(3.646)      | 2.357<br>(3.650)      |
| Observations                                  | 697                   | 695                   | 635                   | 633                   | 706                    | 704                    | 583                   | 582                   |
| Model                                         | Tobit                 | Tobit                 | Tobit                 | Tobit                 | Tobit                  | Tobit                  | Tobit                 | Tobit                 |
| FE                                            | Year                  | Year                  | Year                  | Year                  | Year                   | Year                   | Year                  | Year                  |
| Cluster                                       | Dyad                  | Dyad                  | Dyad                  | Dyad                  | Dyad                   | Dyad                   | Dyad                  | Dyad                  |

Notes: Dependent variable is the log of (one plus) health aid disbursement from donor to recipient in year t. All variables except Gavi Graduate, Colony, Civil War, Democracy, U5MR, DTP3 coverage and HDI are measured in natural logs. \*p<0.10, \*\*p<0.05, \*\*\*p<0.01.
