# Supplementary material for: Strategic donor behaviour and country vulnerability in health aid transitions
Source: HighWire-hosted journal article supplement (doi:10.1136/bmjgh-2023-012953), 2023-11-01
Supplement: bmjgh-2023-012953supp004_data_supplement.pdf [file bmjgh-2023-012953supp004_data_supplement.pdf]

## Appendix 4 Alternative models

Table S4.1 Two-part analysis on health ODA

| Variables                                     | M3-1                    | M3-2                   | M4-1                   | M4-2                   |
|-----------------------------------------------|-------------------------|------------------------|------------------------|------------------------|
| Gavi graduate                                 | -0.170<br>(0.107)       | -0.359***<br>(0.120)   |                        |                        |
| Gavi disbursement                             |                         |                        | 0.0923***<br>(0.0283)  | 0.116***<br>(0.0291)   |
| <b>Recipient-donor relationship variables</b> |                         |                        |                        |                        |
| Distance                                      | -0.0710<br>(0.0651)     | -0.288***<br>(0.0806)  | -0.0755<br>(0.0656)    | -0.300***<br>(0.0822)  |
| Donor imports                                 | 0.00308<br>(0.0241)     | 0.00835<br>(0.0219)    | 0.00485<br>(0.0241)    | 0.00872<br>(0.0218)    |
| Migrants                                      | 0.0455**<br>(0.0224)    | 0.0199<br>(0.0226)     | 0.0486**<br>(0.0226)   | 0.0238<br>(0.0225)     |
| Colony                                        | 0.0768<br>(0.0787)      | 0.0108<br>(0.0825)     | 0.0863<br>(0.0787)     | 0.00652<br>(0.0824)    |
| US military                                   | -0.0102<br>(0.0194)     | 0.0252<br>(0.0201)     | 0.000675<br>(0.0196)   | 0.0366*<br>(0.0201)    |
| Donor exports                                 | -0.00889<br>(0.0264)    | -0.0426*<br>(0.0237)   | -0.0149<br>(0.0265)    | -0.0488**<br>(0.0239)  |
| <b>Recipient variables</b>                    |                         |                        |                        |                        |
| Population                                    | 0.163***<br>(0.0351)    | 0.213***<br>(0.0324)   | 0.203***<br>(0.0334)   | 0.268***<br>(0.0307)   |
| GDP per capita                                | -0.340***<br>(0.0740)   | -0.287***<br>(0.0797)  | -0.338***<br>(0.0738)  | -0.275***<br>(0.0791)  |
| Disaster                                      | 0.00276<br>(0.00416)    | 0.00468<br>(0.00398)   | 0.00373<br>(0.00414)   | 0.00610<br>(0.00396)   |
| Civil war                                     | -0.0117<br>(0.0686)     | -0.0636<br>(0.0658)    | 0.0103<br>(0.0687)     | -0.0401<br>(0.0664)    |
| Democracy                                     | -0.0452**<br>(0.0191)   | -0.0466***<br>(0.0173) | -0.0501***<br>(0.0192) | -0.0511***<br>(0.0174) |
| U5MR                                          | 6.27e-05<br>(0.00152)   | -0.00194<br>(0.00146)  | 9.91e-06<br>(0.00152)  | -0.00227<br>(0.00148)  |
| DTP3 coverage                                 | 0.00533**<br>(0.00233)  | 0.00118<br>(0.00219)   | 0.00592**<br>(0.00233) | 0.00179<br>(0.00218)   |
| HDI                                           | 0.0688<br>(0.544)       | -0.518<br>(0.634)      | -0.312<br>(0.531)      | -1.076*<br>(0.639)     |
| Year                                          | -0.0262***<br>(0.00667) |                        | -0.0123**<br>(0.00613) |                        |
| Constant                                      | 55.11***<br>(13.51)     | 5.957***<br>(1.029)    | 27.44**<br>(12.49)     | 6.263***<br>(1.025)    |
| Observations                                  | 10,275                  | 6,926                  | 10,247                 | 6,906                  |
| R-squared                                     |                         | 0.396                  |                        | 0.399                  |
| Model                                         | Probit                  | OLS                    | Probit                 | OLS                    |
| Fix Effects (FE)                              |                         | Donor, Year            |                        | Donor, Year            |
| Cluster                                       | Dyad                    | Dyad                   | Dyad                   | Dyad                   |

Notes: Dependent variable is the log of (one plus) health aid disbursement from donor to recipient in year t. All variables except Gavi Graduate, Colony, Civil War, Democracy, U5MR, DTP3 coverage and HDI are measured in natural logs. \*p<0.10, \*\*p<0.05, \*\*\*p<0.01.

Table S4.2 Full models of time effect of Gavi funding and graduation on bilateral donor ODA

| Variable                                      | All sector ODA         |                        |                        |                        | Health ODA             |                        |                        |                        |
|-----------------------------------------------|------------------------|------------------------|------------------------|------------------------|------------------------|------------------------|------------------------|------------------------|
|                                               | Lag 3 years            | Lag 3 years            | Lag 5 years            | Lag 5 years            | Lag 3 years            | Lag 3 years            | Lag 5 years            | Lag 5 years            |
|                                               | M6                     | M5                     | M8                     | M7                     | M10                    | M9                     | M12                    | M11                    |
| Gavi graduate                                 | -0.551***<br>(0.156)   |                        | -0.687***<br>(0.186)   |                        | -0.619***<br>(0.170)   |                        | -0.621***<br>(0.200)   |                        |
| Gavi disbursement                             |                        | 0.139***<br>(0.0303)   |                        | 0.126***<br>(0.0333)   |                        | 0.155***<br>(0.0319)   |                        | 0.141***<br>(0.0366)   |
| <b>Recipient-donor relationship variables</b> |                        |                        |                        |                        |                        |                        |                        |                        |
| Distance                                      | -0.608***<br>(0.107)   | -0.581***<br>(0.105)   | -0.636***<br>(0.108)   | -0.616***<br>(0.107)   | -0.450***<br>(0.101)   | -0.424***<br>(0.0978)  | -0.440***<br>(0.102)   | -0.427***<br>(0.100)   |
| Donor imports                                 | -0.0563**<br>(0.0250)  | -0.0486*<br>(0.0250)   | -0.0822***<br>(0.0275) | -0.0753***<br>(0.0274) | -0.0052<br>(0.0264)    | 0.0021<br>(0.0263)     | -0.0109<br>(0.0301)    | -0.0088<br>(0.0300)    |
| Migrants                                      | 0.0207<br>(0.0255)     | 0.0211<br>(0.0258)     | -0.0080<br>(0.0269)    | -0.0031<br>(0.0271)    | 0.0337<br>(0.0263)     | 0.0330<br>(0.0262)     | 0.0345<br>(0.0281)     | 0.0347<br>(0.0279)     |
| Colony                                        | 0.225**<br>(0.0959)    | 0.245**<br>(0.0956)    | 0.237**<br>(0.0998)    | 0.270***<br>(0.0999)   | 0.0928<br>(0.0990)     | 0.111<br>(0.0980)      | 0.0968<br>(0.104)      | 0.123<br>(0.103)       |
| US military                                   | 0.105***<br>(0.0232)   | 0.0923***<br>(0.0226)  | 0.0929***<br>(0.0242)  | 0.0835***<br>(0.0237)  | 0.0264<br>(0.0235)     | 0.0124<br>(0.0231)     | 0.0265<br>(0.0244)     | 0.0126<br>(0.0242)     |
| Donor exports                                 | 0.0098<br>(0.0281)     | 0.0095<br>(0.0276)     | 0.0238<br>(0.0299)     | 0.0228<br>(0.0296)     | -0.0271<br>(0.0287)    | -0.0268<br>(0.0281)    | -0.0259<br>(0.0307)    | -0.0219<br>(0.0303)    |
| <b>Recipient variables</b>                    |                        |                        |                        |                        |                        |                        |                        |                        |
| Population                                    | 0.446***<br>(0.0373)   | 0.372***<br>(0.0397)   | 0.491***<br>(0.0395)   | 0.419***<br>(0.0412)   | 0.391***<br>(0.0367)   | 0.307***<br>(0.0380)   | 0.406***<br>(0.0390)   | 0.334***<br>(0.0396)   |
| GDP per capita                                | -0.311***<br>(0.0909)  | -0.349***<br>(0.0913)  | -0.176<br>(0.111)      | -0.218**<br>(0.111)    | -0.443***<br>(0.0899)  | -0.480***<br>(0.0893)  | -0.411***<br>(0.115)   | -0.443***<br>(0.114)   |
| Disaster                                      | 0.0237***<br>(0.0046)  | 0.0234***<br>(0.0046)  | 0.0170***<br>(0.0049)  | 0.0188***<br>(0.0048)  | 0.0053<br>(0.0047)     | 0.0051<br>(0.0047)     | -0.0015<br>(0.0051)    | -0.0002<br>(0.0051)    |
| Civil war                                     | 0.100<br>(0.0787)      | 0.0983<br>(0.0773)     | 0.0882<br>(0.0832)     | 0.102<br>(0.0827)      | -0.0428<br>(0.0781)    | -0.0511<br>(0.0780)    | -0.0656<br>(0.0835)    | -0.0715<br>(0.0850)    |
| Democracy                                     | -0.0426**<br>(0.0214)  | -0.0456**<br>(0.0211)  | -0.0315<br>(0.0220)    | -0.0408*<br>(0.0218)   | -0.0676***<br>(0.0206) | -0.0698***<br>(0.0202) | -0.0642***<br>(0.0214) | -0.0701***<br>(0.0211) |
| U5MR                                          | -0.0057***<br>(0.0019) | -0.0053***<br>(0.0019) | -0.0101***<br>(0.0024) | -0.0096***<br>(0.0024) | -0.0030<br>(0.0018)    | -0.0025<br>(0.0018)    | -0.0043*<br>(0.0024)   | -0.0039<br>(0.0024)    |
| DTP3 coverage                                 | -0.0002<br>(0.0024)    | -0.0010<br>(0.0024)    | -0.0031<br>(0.0025)    | -0.0031<br>(0.0025)    | 0.0057**<br>(0.0025)   | 0.0048*<br>(0.0025)    | 0.0048*<br>(0.0026)    | 0.0041<br>(0.0026)     |
| HDI                                           | -1.152<br>(0.785)      | -0.415<br>(0.783)      | -2.717**<br>(1.083)    | -2.091*<br>(1.094)     | -1.601**<br>(0.753)    | -0.764<br>(0.750)      | -2.258**<br>(1.095)    | -1.565<br>(1.099)      |
| Constant                                      | 9.490***<br>(1.221)    | 9.194***<br>(1.212)    | 9.785***<br>(1.251)    | 9.658***<br>(1.259)    | 7.338***<br>(1.352)    | 6.802***<br>(1.329)    | 7.497***<br>(1.408)    | 7.127***<br>(1.378)    |
| Observations                                  | 7,969                  | 7,942                  | 5,877                  | 5,852                  | 7,969                  | 7,942                  | 5,877                  | 5,852                  |
| R-squared                                     | 0.472                  | 0.474                  | 0.489                  | 0.491                  |                        |                        |                        |                        |
| Model                                         | OLS                    | OLS                    | OLS                    | OLS                    | Tobit                  | Tobit                  | Tobit                  | Tobit                  |
| Fix Effects (FE)                              | Donor,<br>Year         | Donor,<br>Year         | Donor,<br>Year         | Donor,<br>Year         | Donor,<br>Year         | Donor,<br>Year         | Donor,<br>Year         | Donor,<br>Year         |
| Cluster                                       | Dyad                   | Dyad                   | Dyad                   | Dyad                   | Dyad                   | Dyad                   | Dyad                   | Dyad                   |

Notes: Dependent variable is the log of (one plus) health aid disbursement from donor to recipient in year t. All variables except Gavi Graduate, Colony, Civil War, Democracy, U5MR, DTP3 coverage and HDI are measured in natural logs. \*p<0.10, \*\*p<0.05, \*\*\*p<0.01.

Table S4.3 Impact of Gavi transition on different types of bilateral ODA and country vulnerability

| Variable                                      | All sector ODA M13   | Health ODA M14       | All sector ODA M15   | Health ODA M16       | All sector ODA M17   | Health ODA M18       | All sector ODA M19   | Health ODA M20       | All sector ODA M21   | Health ODA M22       | All sector ODA M23   | Health ODA M24       | All sector ODA M25   | Health ODA M26       |
|-----------------------------------------------|----------------------|----------------------|----------------------|----------------------|----------------------|----------------------|----------------------|----------------------|----------------------|----------------------|----------------------|----------------------|----------------------|----------------------|
| Gavi graduate                                 | -0.563<br>(1.715)    | -0.525<br>(1.730)    | -1.262<br>(1.204)    | -1.227<br>(1.288)    | -0.227<br>(0.180)    | -0.347<br>(0.218)    | -0.217<br>(0.624)    | 0.028<br>(0.624)     | -0.457***<br>(0.135) | -0.511***<br>(0.146) | -0.246<br>(0.163)    | -0.423**<br>(0.179)  | -0.158<br>(0.192)    | -0.299<br>(0.236)    |
| <b>Interactions</b>                           |                      |                      |                      |                      |                      |                      |                      |                      |                      |                      |                      |                      |                      |                      |
| Gavi graduate * distance                      | 0.050<br>(0.188)     | 0.078<br>(0.180)     | 0.105<br>(0.141)     | 0.089<br>(0.150)     |                      |                      |                      |                      |                      |                      |                      |                      |                      |                      |
| Gavi graduate * donor imports                 | 0.152<br>(0.106)     | 0.159<br>(0.130)     |                      |                      | -0.021<br>(0.029)    | -0.017<br>(0.030)    |                      |                      |                      |                      |                      |                      |                      |                      |
| Gavi graduate * migrants                      | 0.002<br>(0.053)     | -0.037<br>(0.059)    |                      |                      |                      |                      | -0.013<br>(0.054)    | -0.040<br>(0.053)    |                      |                      |                      |                      |                      |                      |
| Gavi graduate * colony                        | 0.255<br>(0.217)     | 0.055<br>(0.250)     |                      |                      |                      |                      |                      |                      | 0.358**<br>(0.179)   | 0.171<br>(0.208)     |                      |                      |                      |                      |
| Gavi graduate * US military                   | -0.010<br>(0.070)    | 0.029<br>(0.069)     |                      |                      |                      |                      |                      |                      |                      |                      | -0.071<br>(0.065)    | -0.027<br>(0.067)    |                      |                      |
| Gavi graduate * donor exports                 | -0.196*<br>(0.073)   | -0.192<br>(0.072)    |                      |                      |                      |                      |                      |                      |                      |                      |                      |                      | -0.031<br>(0.073)    | -0.0240<br>(0.072)   |
| <b>Recipient-donor relationship variables</b> |                      |                      |                      |                      |                      |                      |                      |                      |                      |                      |                      |                      |                      |                      |
| Distance                                      | -0.609***<br>(0.107) | -0.462***<br>(0.103) | -0.609***<br>(0.107) | -0.460***<br>(0.102) | -0.585***<br>(0.101) | -0.442***<br>(0.096) | -0.589***<br>(0.102) | -0.446***<br>(0.096) | -0.599***<br>(0.102) | -0.448***<br>(0.097) | -0.594***<br>(0.103) | -0.445***<br>(0.097) | -0.585***<br>(0.101) | -0.442***<br>(0.096) |
| Donor imports                                 | -0.021<br>(0.024)    | 0.019<br>(0.024)     | -0.018<br>(0.023)    | 0.020<br>(0.024)     | -0.018<br>(0.023)    | 0.020<br>(0.024)     | -0.018<br>(0.023)    | 0.021<br>(0.024)     | -0.020<br>(0.023)    | 0.019<br>(0.024)     | -0.018<br>(0.023)    | 0.012<br>(0.024)     | -0.019<br>(0.023)    | 0.02<br>(0.024)      |
| Migrants                                      | 0.030<br>(0.024)     | 0.043*<br>(0.025)    | 0.034<br>(0.023)     | 0.044*<br>(0.024)    | 0.033<br>(0.024)     | 0.042*<br>(0.024)    | 0.035<br>(0.024)     | 0.045*<br>(0.024)    | 0.032<br>(0.024)     | 0.043*<br>(0.024)    | 0.034<br>(0.023)     | 0.044*<br>(0.024)    | 0.032<br>(0.024)     | 0.042*<br>(0.024)    |
| Colony                                        | 0.235**<br>(0.095)   | 0.094<br>(0.097)     | 0.247***<br>(0.093)  | 0.099<br>(0.094)     | 0.240***<br>(0.092)  | 0.0927<br>(0.094)    | 0.244***<br>(0.092)  | 0.096<br>(0.093)     | 0.228**<br>(0.092)   | 0.089<br>(0.094)     | 0.252***<br>(0.092)  | 0.099<br>(0.094)     | 0.239***<br>(0.092)  | 0.092<br>(0.094)     |
| US military                                   | 0.114***<br>(0.023)  | 0.030<br>(0.023)     | 0.116***<br>(0.022)  | 0.0322<br>(0.022)    | 0.114***<br>(0.023)  | 0.031<br>(0.022)     | 0.115***<br>(0.022)  | 0.031<br>(0.022)     | 0.114***<br>(0.022)  | 0.031<br>(0.022)     | 0.119***<br>(0.022)  | 0.033<br>(0.022)     | 0.113***<br>(0.023)  | 0.030<br>(0.022)     |
| Donor exports                                 | -0.017<br>(0.028)    | -0.046*<br>(0.027)   | -0.027<br>(0.026)    | -0.051*<br>(0.026)   | -0.021<br>(0.027)    | -0.047*<br>(0.026)   | -0.025<br>(0.026)    | -0.050*<br>(0.026)   | -0.024<br>(0.027)    | -0.050*<br>(0.027)   | -0.026<br>(0.026)    | -0.051*<br>(0.026)   | -0.019<br>(0.027)    | -0.046*<br>(0.027)   |
| <b>Recipient variables</b>                    |                      |                      |                      |                      |                      |                      |                      |                      |                      |                      |                      |                      |                      |                      |
| Population                                    | 0.427***<br>(0.036)  | 0.379***<br>(0.036)  | 0.420***<br>(0.035)  | 0.375***<br>(0.035)  | 0.423***<br>(0.036)  | 0.377***<br>(0.036)  | 0.420***<br>(0.035)  | 0.376***<br>(0.035)  | 0.426***<br>(0.036)  | 0.377***<br>(0.035)  | 0.419***<br>(0.035)  | 0.374***<br>(0.035)  | 0.424***<br>(0.035)  | 0.378***<br>(0.036)  |
| GDP per capita                                | -0.378***<br>(0.082) | -0.498***<br>(0.085) | -0.383***<br>(0.078) | -0.488***<br>(0.078) | -0.385***<br>(0.078) | -0.489***<br>(0.077) | -0.386***<br>(0.082) | -0.501***<br>(0.083) | -0.372***<br>(0.078) | -0.481***<br>(0.078) | -0.387***<br>(0.078) | -0.488***<br>(0.078) | -0.386***<br>(0.078) | -0.489***<br>(0.077) |
| Disaster                                      | 0.022***<br>(0.004)  | 0.007*<br>(0.004)    | 0.024***<br>(0.004)  | 0.007*<br>(0.004)    | 0.024***<br>(0.004)  | 0.008*<br>(0.004)    | 0.024***<br>(0.004)  | 0.008*<br>(0.004)    | 0.023***<br>(0.004)  | 0.007*<br>(0.004)    | 0.023***<br>(0.004)  | 0.007*<br>(0.004)    | 0.0235***<br>(0.004) | 0.007*<br>(0.004)    |
| Civil war                                     | 0.134*<br>(0.073)    | -0.043<br>(0.072)    | 0.139*<br>(0.073)    | -0.038<br>(0.072)    | 0.135*<br>(0.073)    | -0.042<br>(0.072)    | 0.139*<br>(0.073)    | -0.040<br>(0.072)    | 0.136*<br>(0.073)    | -0.040<br>(0.072)    | 0.141*<br>(0.073)    | -0.0375<br>(0.073)   | 0.134*<br>(0.073)    | -0.043<br>(0.072)    |

|               |                      |                      |                      |                      |                      |                      |                      |                      |                      |                      |                      |                      |                      |                      |
|---------------|----------------------|----------------------|----------------------|----------------------|----------------------|----------------------|----------------------|----------------------|----------------------|----------------------|----------------------|----------------------|----------------------|----------------------|
| Democracy     | -0.050**<br>(0.021)  | -0.072***<br>(0.020) | -0.051**<br>(0.021)  | -0.075***<br>(0.020) | -0.048**<br>(0.020)  | -0.072***<br>(0.019) | -0.050**<br>(0.020)  | -0.073***<br>(0.019) | -0.049**<br>(0.021)  | -0.073***<br>(0.020) | -0.053**<br>(0.021)  | -0.075***<br>(0.020) | -0.048**<br>(0.020)  | -0.072***<br>(0.019) |
| U5mr          | -0.005***<br>(0.001) | -0.002<br>(0.002)    | -0.005**<br>(0.002)  | -0.002<br>(0.002)    | -0.005***<br>(0.002) | -0.002<br>(0.002)    | -0.005***<br>(0.002) | -0.002<br>(0.002)    | -0.005***<br>(0.002) | -0.002<br>(0.002)    | -0.005***<br>(0.002) | -0.002<br>(0.002)    | -0.005***<br>(0.002) | -0.002<br>(0.002)    |
| Dtp3 coverage | 0.000<br>(0.003)     | 0.006**<br>(0.003)   | 0.0001<br>(0.002)    | 0.006***<br>(0.002)  | 0.001<br>(0.002)     | 0.007***<br>(0.002)  | 0.001<br>(0.002)     | 0.006***<br>(0.002)  | 0.001<br>(0.002)     | 0.006***<br>(0.002)  | 0.000<br>(0.003)     | 0.006**<br>(0.003)   | 0.001<br>(0.002)     | 0.007***<br>(0.002)  |
| HDI           | -0.733<br>(0.610)    | -1.000<br>(0.642)    | -0.662<br>(0.585)    | -1.075*<br>(0.585)   | -0.617<br>(0.585)    | -1.044*<br>(0.580)   | -0.619<br>(0.605)    | -0.944<br>(0.629)    | -0.720<br>(0.586)    | -1.108*<br>(0.586)   | -0.678<br>(0.583)    | -1.083*<br>(0.584)   | -0.614<br>(0.585)    | -1.043*<br>(0.580)   |
| Year          | 0.427***<br>(0.036)  | 0.379***<br>(0.036)  | 0.420***<br>(0.035)  | 0.375***<br>(0.035)  | 0.423***<br>(0.035)  | 0.377***<br>(0.036)  | 0.420***<br>(0.035)  | 0.376***<br>(0.035)  | 0.426***<br>(0.036)  | 0.377***<br>(0.035)  | 0.419***<br>(0.035)  | 0.374***<br>(0.035)  | 0.424***<br>(0.035)  | 0.378***<br>(0.036)  |
| Constant      | -0.378***<br>(0.082) | -0.498***<br>(0.085) | -0.383***<br>(0.078) | -0.488***<br>(0.078) | -0.385***<br>(0.078) | -0.489***<br>(0.077) | -0.386***<br>(0.082) | -0.501***<br>(0.083) | -0.372***<br>(0.078) | -0.481***<br>(0.078) | -0.387***<br>(0.078) | -0.488***<br>(0.078) | -0.386***<br>(0.078) | -0.489***<br>(0.077) |
| Observations  | 10,275               | 10,275               | 10,275               | 10,275               | 10,275               | 10,275               | 10,275               | 10,275               | 10,275               | 10,275               | 10,275               | 10,275               | 10,275               | 10,275               |
| R-squared     | 0.463                |                      | 0.462                |                      | 0.462                |                      | 0.462                |                      | 0.462                |                      | 0.462                |                      | 0.462                |                      |
| Model         | OLS                  | Tobit                | OLS                  | Tobit                | OLS                  | Tobit                | OLS                  | Tobit                | OLS                  | Tobit                | OLS                  | Tobit                | OLS                  | Tobit                |
| FE            | Donor,<br>Year       | Donor,<br>Year       | Donor,<br>Year       | Donor,<br>Year       | Donor,<br>Year       | Donor,<br>Year       | Donor,<br>Year       | Donor,<br>Year       | Donor,<br>Year       | Donor,<br>Year       | Donor,<br>Year       | Donor,<br>Year       | Donor,<br>Year       | Donor,<br>Year       |
| Cluster       | Dyad                 | Dyad                 | Dyad                 | Dyad                 | Dyad                 | Dyad                 | Dyad                 | Dyad                 | Dyad                 | Dyad                 | Dyad                 | Dyad                 | Dyad                 | Dyad                 |

Notes: Dependent variable is the log of (one plus) health aid disbursement from donor to recipient in year t. All variables except Gavi Graduate, Colony, Civil War, Democracy, U5MR, DTP3 coverage and HDI are measured in natural logs. \*p<0.10, \*\*p<0.05, \*\*\*p<0.01.
