# Supplementary material for: Strategic donor behaviour and country vulnerability in health aid transitions
Source: BMJ Glob Health. 2023 Nov 8;8(11):e012953. doi: 10.1136/bmjgh-2023-012953 (PMC10632813; doi:10.1136/bmjgh-2023-012953)
Supplement: Supplementary data [file bmjgh-2023-012953supp001.pdf]

## Appendix 1 Gavi eligible countries included in analysis

77 countries are/were eligible to receive Gavi support during the study period and among the 77 countries, 23 countries have graduated from Gavi support.

|    | Gavi eligible countries               | Graduation year | Samples included in analysis (and reasons for exclusion) |
|----|---------------------------------------|-----------------|----------------------------------------------------------|
| 1  | Afghanistan                           |                 | 170                                                      |
| 2  | Albania                               | 2013 *          | 150                                                      |
| 3  | Angola                                | 2017            | 157                                                      |
| 4  | Armenia                               | 2017            | 148                                                      |
| 5  | Azerbaijan                            | 2017            | 126                                                      |
| 6  | Bangladesh                            |                 | 170                                                      |
| 7  | Benin                                 |                 | 149                                                      |
| 8  | Bhutan                                | 2015            | 114                                                      |
| 9  | Bolivia                               | 2017            | 166                                                      |
| 10 | Bosnia and Herzegovina                | 2011*           | 164                                                      |
| 11 | Burkina Faso                          |                 | 163                                                      |
| 12 | Burundi                               |                 | 163                                                      |
| 13 | Cambodia                              |                 | 166                                                      |
| 14 | Cameroon                              |                 | 152                                                      |
| 15 | Central African Republic              |                 | 149                                                      |
| 16 | Chad                                  |                 | 141                                                      |
| 17 | China (People's Republic of)          | 2006*           | 168                                                      |
| 18 | Comoros                               |                 | 64                                                       |
| 19 | Congo                                 |                 | 128                                                      |
| 20 | Côte d'Ivoire                         |                 | 149                                                      |
| 21 | Cuba                                  | 2016            | 68                                                       |
| 22 | Democratic People's Republic of Korea |                 | Excluded: HDI and GDP data not available                 |
| 23 | Democratic Republic of the Congo      |                 | Excluded: Distance not available                         |
| 24 | Djibouti                              |                 | 62 (2012-2017): GDP data incomplete                      |
| 25 | Eritrea                               |                 | 73 (2009-2012): GDP data incomplete                      |
| 26 | Ethiopia                              |                 | 170                                                      |
| 27 | Gambia                                |                 | 138                                                      |
| 28 | Georgia                               | 2017            | 151                                                      |
| 29 | Ghana                                 |                 | 170                                                      |
| 30 | Guinea                                |                 | 138                                                      |
| 31 | Guinea-Bissau                         |                 | 129                                                      |
| 32 | Guyana                                | 2016            | 83                                                       |
| 33 | Haiti                                 |                 | 154                                                      |
| 34 | Honduras                              | 2015            | 161                                                      |
| 35 | India                                 |                 | 153                                                      |
| 36 | Indonesia                             | 2016            | 165                                                      |
| 37 | Kenya                                 |                 | 170                                                      |
| 38 | Kiribati                              | 2016            | 46                                                       |

|    |                                  |       |                                  |
|----|----------------------------------|-------|----------------------------------|
| 39 | Kyrgyzstan                       |       | 128                              |
| 40 | Lao People's Democratic Republic |       | 139                              |
| 41 | Lesotho                          |       | 124                              |
| 42 | Liberia                          |       | 153                              |
| 43 | Madagascar                       |       | 143                              |
| 44 | Malawi                           |       | 161                              |
| 45 | Mali                             |       | 160                              |
| 46 | Mauritania                       |       | 131                              |
| 47 | Moldova                          | 2016  | 141                              |
| 48 | Mongolia                         | 2015  | 143                              |
| 49 | Mozambique                       |       | 170                              |
| 50 | Myanmar                          |       | 165                              |
| 51 | Nepal                            |       | 170                              |
| 52 | Nicaragua                        | 2020  | 163                              |
| 53 | Niger                            |       | 158                              |
| 54 | Nigeria                          |       | 168                              |
| 55 | Pakistan                         |       | 170                              |
| 56 | Papua New Guinea                 |       | 91                               |
| 57 | Rwanda                           |       | 165                              |
| 58 | Sao Tome and Principe            |       | 68                               |
| 59 | Senegal                          |       | 160                              |
| 60 | Sierra Leone                     |       | 160                              |
| 61 | Solomon Islands                  |       | 73                               |
| 62 | Somalia                          |       | Excluded: HDI not available      |
| 63 | South Sudan                      |       | Excluded: Distance not available |
| 64 | Sri Lanka                        | 2015  | 163                              |
| 65 | Sudan                            |       | 170                              |
| 66 | Tajikistan                       |       | 139                              |
| 67 | Tanzania                         |       | 168                              |
| 68 | Timor-Leste                      | 2017  | Excluded: Distance not available |
| 69 | Togo                             |       | 141                              |
| 70 | Turkmenistan                     | 2007* | 72                               |
| 71 | Uganda                           |       | 170                              |
| 72 | Ukraine                          | 2010* | 158                              |
| 73 | Uzbekistan                       | 2020  | 113                              |
| 74 | Viet Nam                         | 2019  | 167                              |
| 75 | Yemen                            |       | 158                              |
| 76 | Zambia                           |       | 166                              |
| 77 | Zimbabwe                         |       | 170                              |

Source: Gavi website. Gavi graduation year indicates the final year of support before becoming fully self-financing.

\*Denotes countries where support ended prior to the establishment of a formal transition policy. These countries transitioned when their GNI per capita exceeded the eligibility threshold.

The following eligible countries are completely or partially excluded from the analysis due to missing values: Timor-Leste, South Sudan, DRC, Somalia, Eritrea (ends in 2012), DPRK
